# Supplementary material
Source: PubMed Central journal article supplement (PMC9464083)
Supplement: Supp_Data.pdf [file Supp_Data.pdf]

## Supplementary Material

### Complete participant eligibility criteria

#### *Inclusion criteria for participation:*

- 1) Age  $\geq 18$  and  $\leq 45$  years at the time of screening.
- 2) Clinical diagnosis of type 1 diabetes
- 3) Currently using an insulin pump at the time of screening.
- 4) HbA1c  $\leq 9\%$ , as performed by point of care or central laboratory testing. A1c will be assessed at the screening visit, or if already completed within 2 months of the screening visit, the prior lab value may be used in lieu of repeating this assessment.
- 5) Pregnant 14-32 weeks gestation.
- 6) Singleton pregnancy without any other significant known complications.
- 7) No proven or suspected fetal malformations diagnosed in the current pregnancy prior to enrollment.
- 8) Willingness to bolus for all meals and snacks that contain  $\geq 5$  grams of carbohydrate.
- 9) Willingness to switch to Novolog or Humalog for the closed-loop session.
- 10) Willingness not to start any new non-insulin glucose-lowering agent during the course of the trial.
- 11) Willing to abide by the study protocol and use study-provided devices.

#### *Exclusionary criteria:*

- 1) Known unstable cardiac disease or untreated cardiac disease, as revealed by history or physical examination.
- 2) Concurrent use of Afrezza or any non-insulin glucose-lowering agent other than metformin (including GLP-1 agonists, Symlin, DPP-4 inhibitors, SGLT-2 inhibitors, sulfonylureas).
- 3) Hemophilia or any other bleeding disorder
- 4) Laboratory results:
  - a. A1C  $> 9\%$
  - b. Abnormal liver or renal function (Transaminase  $> 2$  times the upper limit of normal, creatinine  $> 1.5$  mg/dL)

c. Labs drawn at screening visit or within three months prior to screening (for other purposes)

will suffice for enrollment purposes

- 5) Dermatological conditions that would preclude wearing a CGM sensor or infusion site.
- 6) Any condition that could interfere with participating in the trial, based on investigator judgment.
- 7) Participation in another pharmaceutical or device trial at the time of enrollment or during the study.
- 8) Having a direct supervisor at place of employment who is also directly involved in conducting the clinical trial (as a study investigator, coordinator, etc.); or having a first-degree relative who is directly involved in conducting the clinical trial

Pregnancy Specific Design of Zone-MPC

| <b>Closed Loop Control</b>                                             |                      |                        |                                                                                                                                      |
|------------------------------------------------------------------------|----------------------|------------------------|--------------------------------------------------------------------------------------------------------------------------------------|
|                                                                        | <b>Nominal Value</b> | <b>Pregnancy Value</b> | <b>Effect of the Change</b>                                                                                                          |
| <b>Day-time target glucose zone</b>                                    | 90-120 mg/dL         | 80-110 mg/dL           | Tighter glucose control as recommended for pregnant women with diabetes                                                              |
| <b>Night-time target glucose zone</b>                                  | 100-120 mg/dL        | 80-100 mg/dL           | Tighter glucose control as recommended for pregnant women with diabetes                                                              |
| <b>Reference fasting glucose</b>                                       | 110 mg/dL            | 90 mg/dL               | Controller deviation variables are calculated using a lower glucose value in the center of the zone                                  |
| <b>Active glucose velocity penalty range</b>                           | 140-180 mg/dL        | 120-180 mg/dL          | Reduced post-prandial glucose exposure as recommended for pregnant women with diabetes                                               |
| <b>User-requested bolus insulin decay curve</b>                        | 4 hours              | 3 hours                | Earlier relaxation of the insulin on board related constraint on the controller action                                               |
| <b>Meal and Correction Control</b>                                     |                      |                        |                                                                                                                                      |
|                                                                        | <b>Nominal Value</b> | <b>Pregnancy Value</b> | <b>Effect of the Change</b>                                                                                                          |
| <b>Additional correction bolus threshold (added to the meal bolus)</b> | 150 mg/dL            | 100 mg/dL              | Reduced post-prandial glucose exposure and more assertive correction bolus as recommended for pregnant women with diabetes           |
| <b>Target glucose in corrections</b>                                   | 150 mg/dL            | 90 mg/dL               | More assertive postprandial glucose control to reduce post-prandial glucose exposure as recommended for pregnant women with diabetes |
| <b>Glucose threshold for reducing meal bolus</b>                       | 120 mg/dL            | 70 mg/dL               | Reduced post-prandial glucose exposure as recommended for pregnant women with diabetes                                               |

# CLC Session Figures for Each Participant

Note: Participant numbers are assigned randomly.

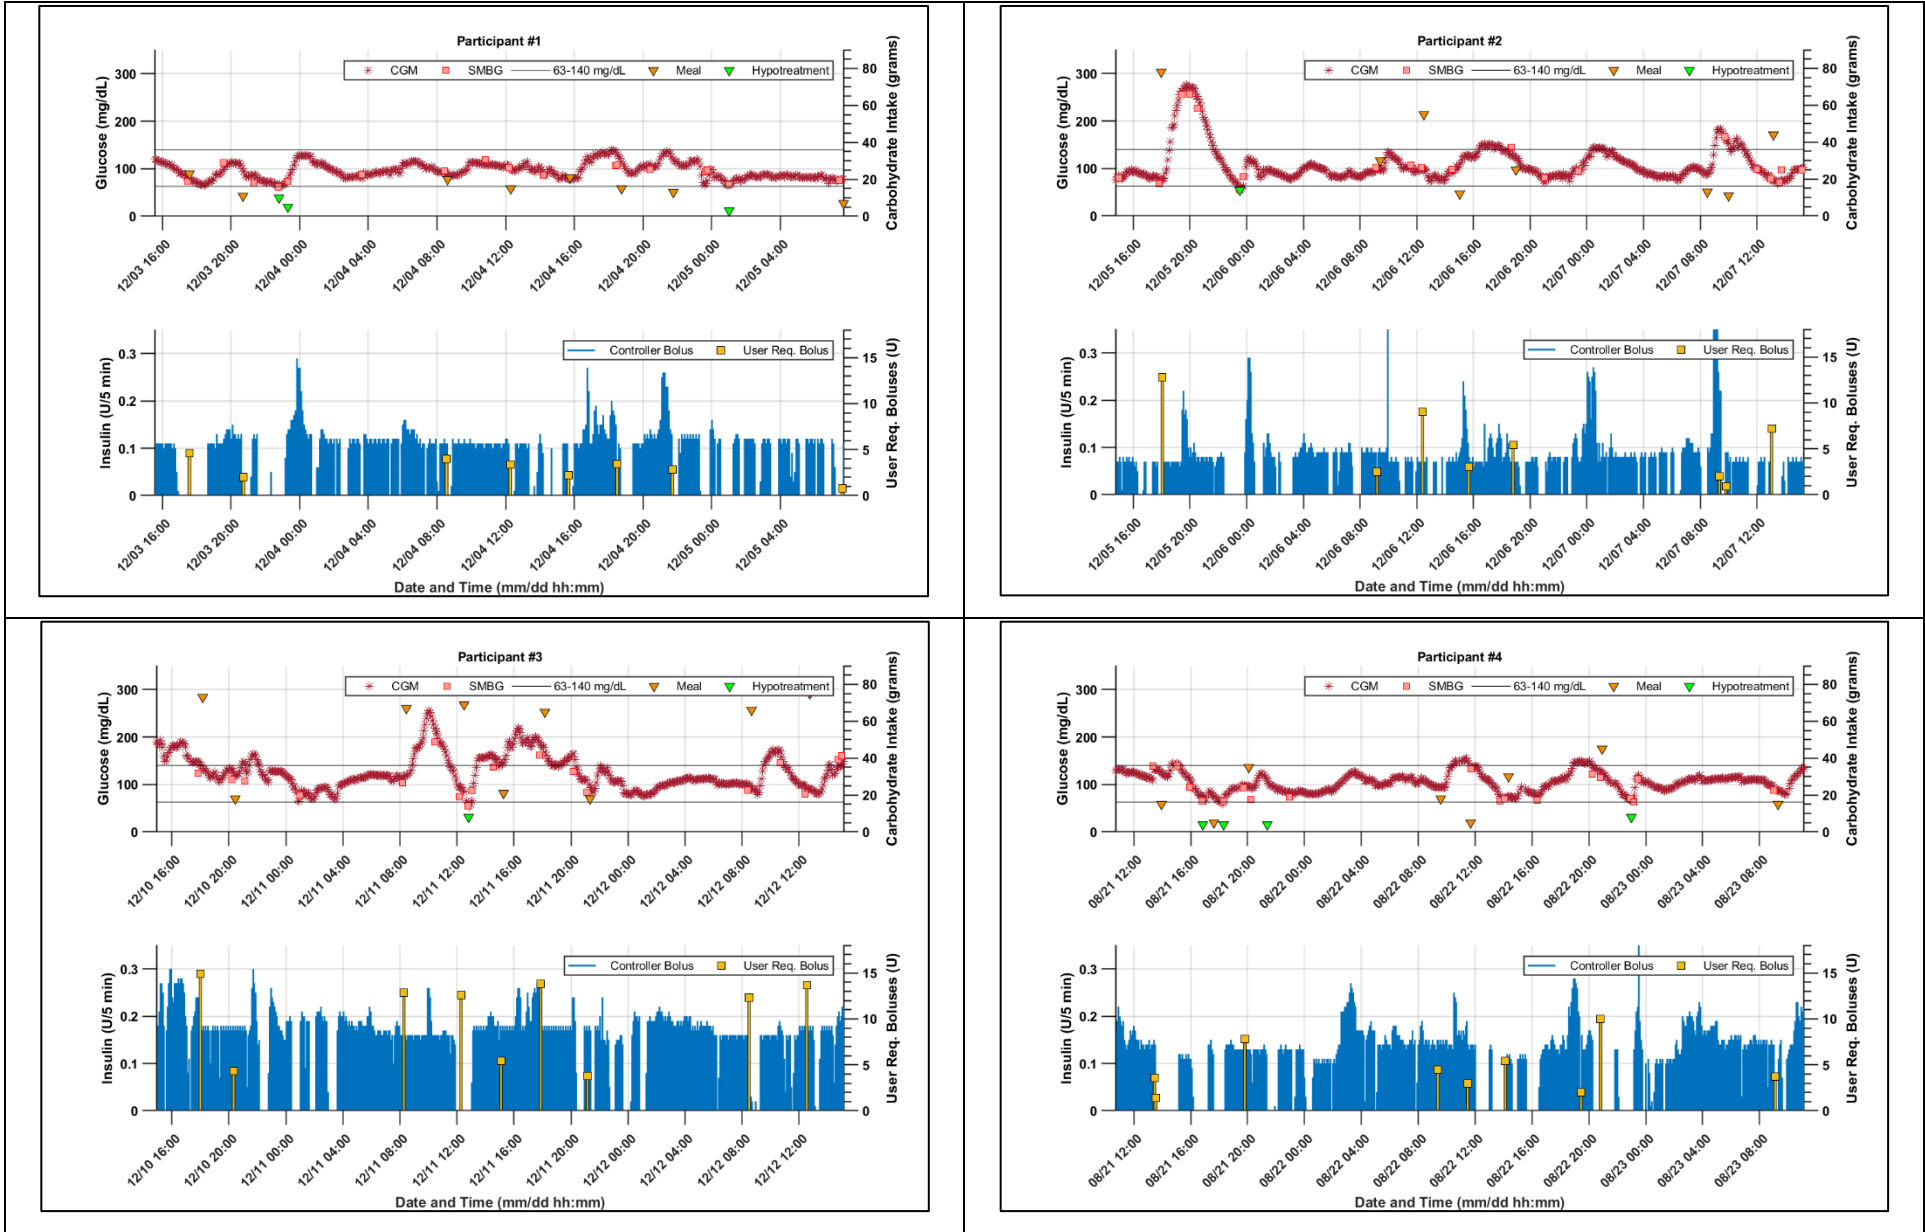

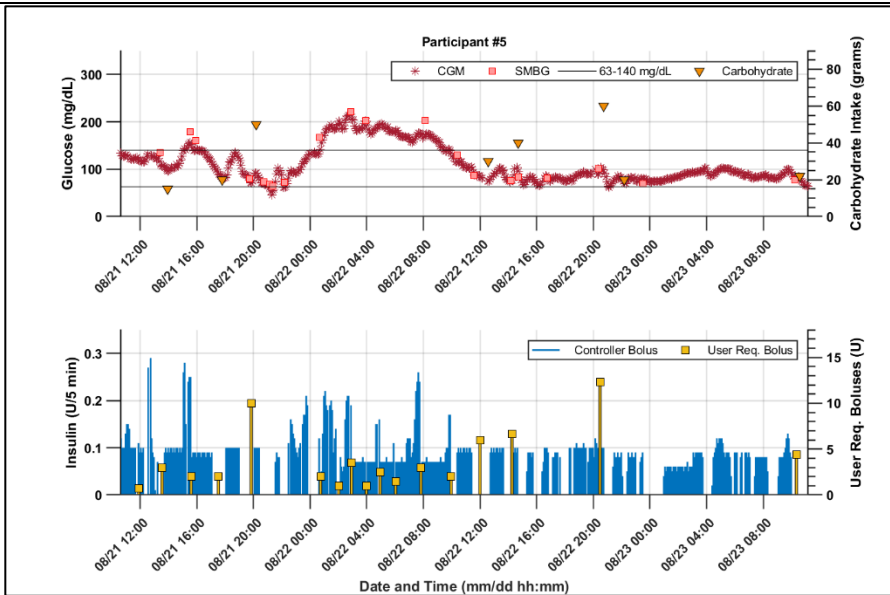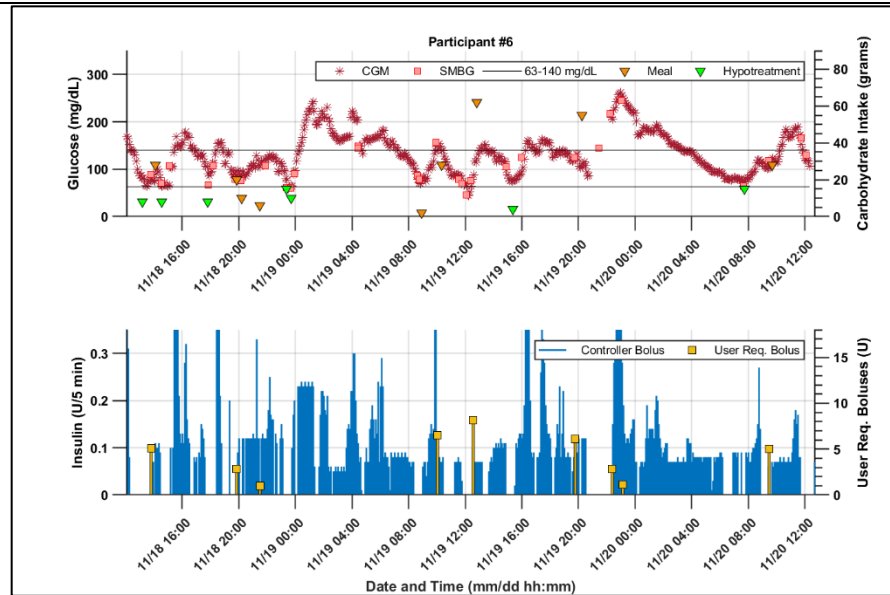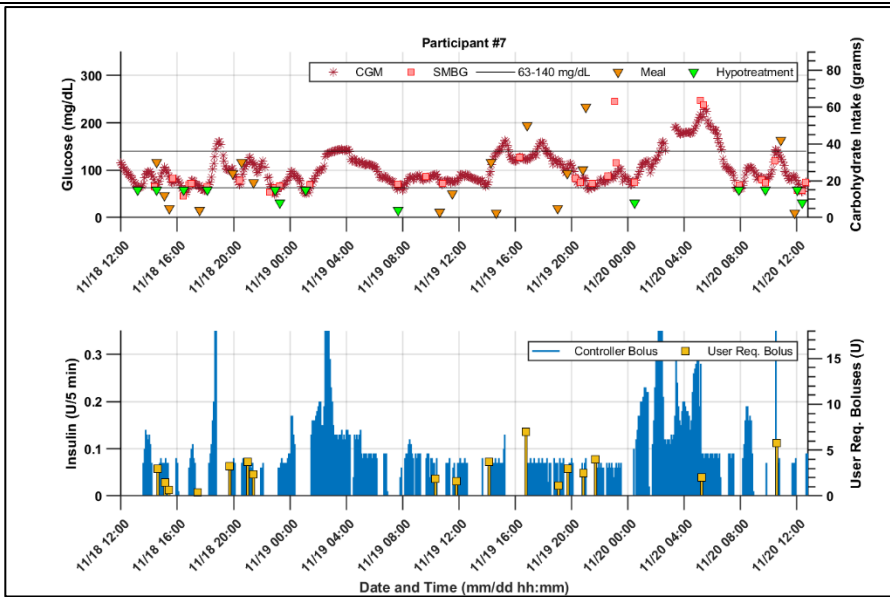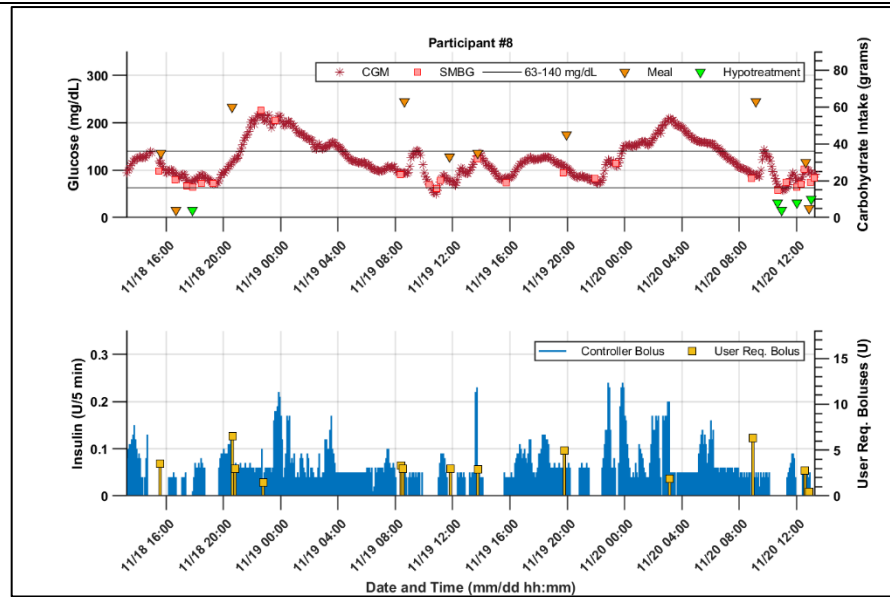

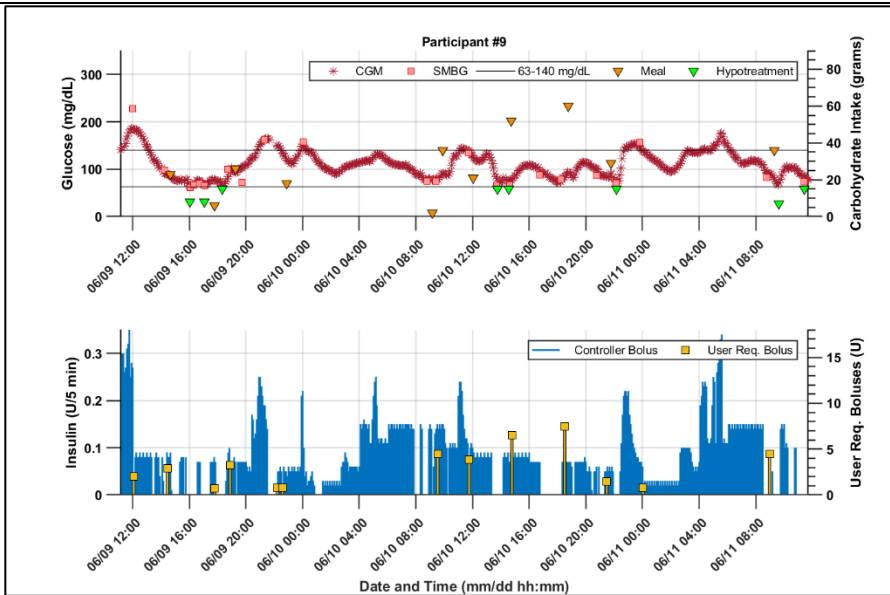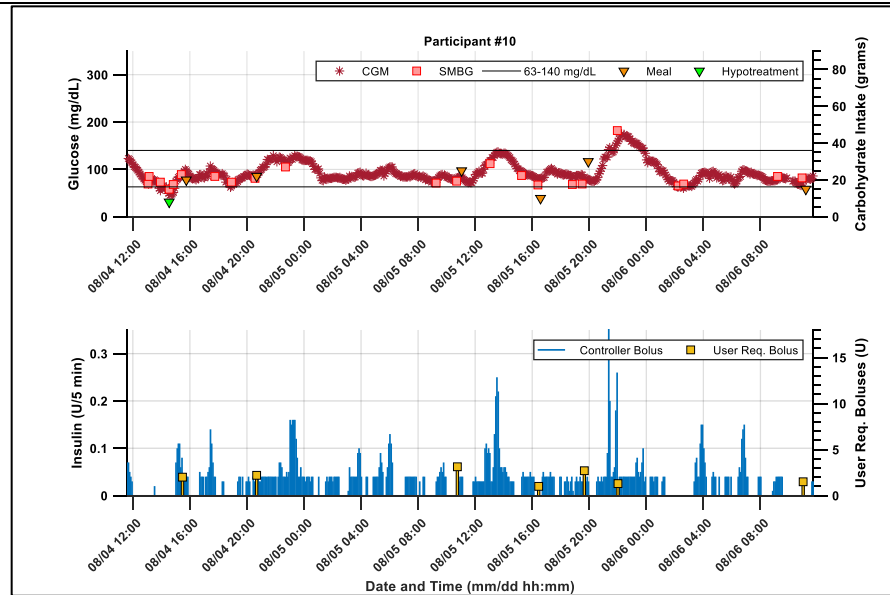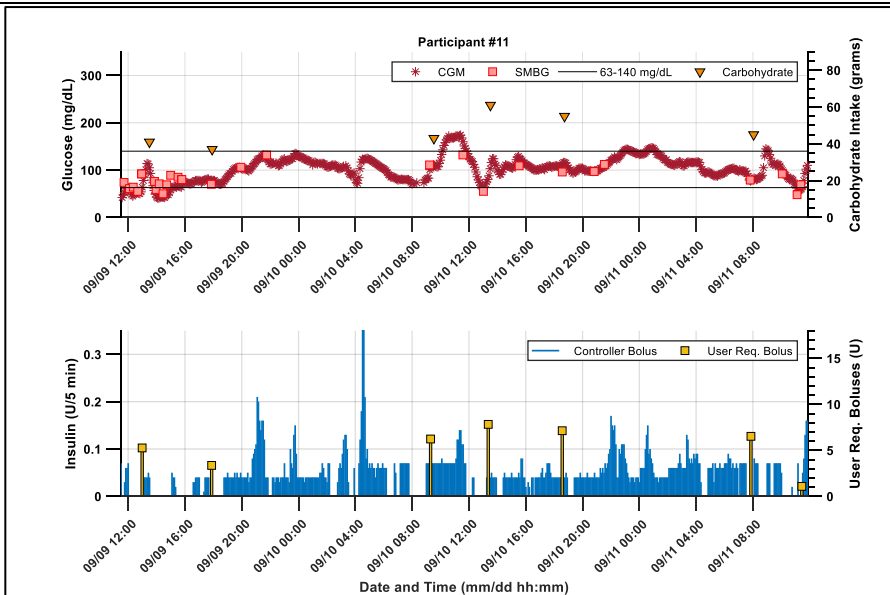

Total recorded carbohydrate ingestion and hypoglycemia treatment information per participant during CLC

| <b>Participant #</b>  | <b>Total Meal and Snack Related Carbohydrate Consumption (g)</b> | <b>Number of Rescues</b> | <b>Total Rescue Related Carbohydrate Consumption (g)</b> |
|-----------------------|------------------------------------------------------------------|--------------------------|----------------------------------------------------------|
| Participant #1        | 125                                                              | 3                        | 18                                                       |
| Participant #2        | 268                                                              | 1                        | 14                                                       |
| Participant #3        | 472                                                              | 1                        | 8                                                        |
| Participant #4        | 168                                                              | 4                        | 20                                                       |
| Participant #5        | 257                                                              | 0                        | 0                                                        |
| Participant #6        | 239                                                              | 7                        | 68                                                       |
| Participant #7        | 382                                                              | 13                       | 163                                                      |
| Participant #8        | 373                                                              | 5                        | 34                                                       |
| Participant #9        | 309                                                              | 8                        | 98                                                       |
| Participant #10       | 122                                                              | 1                        | 8                                                        |
| Participant #11       | 282                                                              | 9                        | 101                                                      |
| <b>Average</b>        | <b>272.5</b>                                                     | <b>4.7</b>               | <b>48.4</b>                                              |
| <b>Std. Deviation</b> | <b>109.6</b>                                                     | <b>4.1</b>               | <b>52.4</b>                                              |

The participants' average daily entered carbohydrate ingestion during the run-in phase (obtained from insulin pump downloads)

| <b>Participant #</b> | <b>Daily Carbohydrate Entry into Insulin Pump (grams)*</b> |
|----------------------|------------------------------------------------------------|
| Participant #1       | 306±36.67                                                  |
| Participant #2       | 144.29±30.77                                               |
| Participant #3       | 326.43±34.85                                               |
| Participant #4       | 88.43±15.52                                                |
| Participant #5       | 134.29±22.63                                               |
| Participant #6       | 77.57±10.2                                                 |
| Participant #7       | 56.29±26.61                                                |
| Participant #8       | 191.29±25.6                                                |
| Participant #9       | 192±57.61                                                  |
| Participant #10      | 72±16.3                                                    |
| Participant #11      | 211±32.55                                                  |
| <b>Average (SD)</b>  | <b>163.6±92.89</b>                                         |

\*This may not fully represent daily carbohydrate intake as some participants reported omitting carbohydrate entry for some meal boluses and/or not bolusing for some meals.
